# Supplementary material for: Serum 25-hydroxyvitamin D concentration in childhood and risk of islet autoimmunity and type 1 diabetes: the TRIGR nested case–control ancillary study
Source: Springer Nature journal article supplement (doi:10.1007/s00125-019-05077-4), 2020-01-07
Supplement: MOESM1 [file 17765126]

## LIST OF TRIGR INVESTIGATORS FOR PUBLICATIONS / version December 2019

| <u>Administration/<br/>Country</u>                                                        | <u>Study center</u> | <u>Last name</u> | <u>First name</u> | <u>Position</u>                                                                 |
|-------------------------------------------------------------------------------------------|---------------------|------------------|-------------------|---------------------------------------------------------------------------------|
| <b>Data Safety Monitoring Board</b>                                                       |                     | Mandrup-Poulsen, | Thomas            | Chair University of Copenhagen, Copenhagen, Denmark                             |
|                                                                                           |                     | Arjas            | Elias             | Member, University of Helsinki, Helsinki, Finland                               |
|                                                                                           |                     | Läärä            | Esa               | Member, University of Oulu, Oulu, Finland                                       |
|                                                                                           |                     | Lernmark         | Åke               | Member, University of Lund, Malmö, Sweden                                       |
|                                                                                           |                     | Schmidt          | Barbara           | Member, University of Pennsylvania, Philadelphia, PA, USA                       |
|                                                                                           |                     | Krischer         | Jeffrey P.        | Observer, University of South Florida, Tampa FL, USA                            |
| <b>International Coordinating Center (ICC), University of Helsinki, Helsinki, Finland</b> |                     | Åkerblom         | Hans K. † *       | PI of the Study until 30.6.08, Deputy PI from 1.7.2008                          |
|                                                                                           |                     | Hyytinen         | Mila              | European Study Monitor                                                          |
|                                                                                           |                     | Knip             | Mikael            | Deputy PI until 30.6.2008, PI of the Study from 1.7.2008, National Investigator |
|                                                                                           |                     | Koski            | Katriina          | European Study Monitor                                                          |
|                                                                                           |                     | Koski            | Matti             | IT Specialist                                                                   |
| <b>Data Management Unit (DMU), University of South Florida, Tampa, FL, USA</b>            |                     | Pajakkala        | Eeva              | European Study Monitor                                                          |
|                                                                                           |                     | Salonen          | Marja             | Study Coordinator                                                               |
|                                                                                           |                     | Cuthbertson      | David             | Biostatistician                                                                 |
|                                                                                           | Krischer            | Jeffrey P.       | PI of the DMU     |                                                                                 |
|                                                                                           | Shanker             | Linda            | Coordinator       |                                                                                 |

## LIST OF TRIGR INVESTIGATORS FOR PUBLICATIONS / version December 2019

| <u>Administration/<br/>Country</u>                                                                                       | <u>Study center</u> | <u>Last name</u>    | <u>First name</u> | <u>Position</u>                                                                                     |
|--------------------------------------------------------------------------------------------------------------------------|---------------------|---------------------|-------------------|-----------------------------------------------------------------------------------------------------|
| <b>Canadian Coordinating<br/>Center, University of<br/>Western Ontario, London,<br/>and University of Ottawa,<br/>ON</b> |                     | Bradley             | Brenda            | National Coordinator                                                                                |
|                                                                                                                          |                     | Dosch               | Hans-Michael      | Co-Investigator for<br>Canada                                                                       |
|                                                                                                                          |                     | Dupré               | John              | Co-PI for North America<br>and<br>National Investigator<br>until 08/12/2015,<br>Executive Committee |
|                                                                                                                          |                     | Fraser              | William           | Co-Investigator for<br>Canada<br>Executive Committee                                                |
|                                                                                                                          |                     | Lawson              | Margaret          | Co-Investigator for<br>Canada<br>Executive Committee                                                |
|                                                                                                                          |                     | Mahon               | Jeffrey L.        | Co-PI for North America<br>and<br>National Investigator<br>after 08/12/2015,<br>Executive Committee |
|                                                                                                                          |                     | Sermer              | Mathew            | Co-Investigator for<br>Canada,<br>Executive Committee                                               |
|                                                                                                                          |                     | Taback              | Shayne P.         | Co-Investigator for<br>Canada,<br>Executive Committee                                               |
| <b>USA Coordinating Center,<br/>University of Pittsburgh,<br/>PA and University of<br/>Washington, Seattle, WA</b>       |                     | Becker              | Dorothy           | Co-PI for North<br>America,<br>National Investigator,<br>Executive Committee                        |
|                                                                                                                          |                     | Franciscus<br>Nucci | Margaret<br>Anita | National Coordinator<br>National Coordinator,<br>Nutrition Coordinator of<br>North America          |
|                                                                                                                          |                     | Palmer              | Jerry             | Executive Committee                                                                                 |

## LIST OF TRIGR INVESTIGATORS FOR PUBLICATIONS / version December 2019

| <u>Administration/<br/>Country</u>                                                                             | <u>Study center</u>                                                                                 | <u>Last name</u>                        | <u>First name</u>                      | <u>Position</u>                                                                                              |
|----------------------------------------------------------------------------------------------------------------|-----------------------------------------------------------------------------------------------------|-----------------------------------------|----------------------------------------|--------------------------------------------------------------------------------------------------------------|
| <b>Nutritional Epidemiology<br/>Unit, National Institute for<br/>Health and Welfare,<br/>Helsinki, Finland</b> |                                                                                                     | Virtanen                                | Suvi M.                                | Head of Nutritional<br>Epidemiology Unit                                                                     |
| <b>Australia</b>                                                                                               | <b>AUS01 - Westmead -<br/>Children's Hospital</b>                                                   | Catteau<br>Howard                       | Jacki<br>Neville                       | National Coordinator<br>National Investigator                                                                |
|                                                                                                                | <b>AUS02 - Newcastle -<br/>John Hunter<br/>Children's Hospital</b>                                  | Crock                                   | Patricia                               | Local Investigator                                                                                           |
|                                                                                                                | <b>AUS03 - Sydney -<br/>Sydney Children's<br/>Hospital</b>                                          | Craig                                   | Maria                                  | Local Investigator                                                                                           |
| <b>Canada</b>                                                                                                  | <b>CAN01 - London - St.<br/>Joseph's Health Care<br/>Centre</b>                                     | Clarson<br>Bere                         | Cheril L.<br>Lynda                     | Local Investigator<br>Coordinator                                                                            |
|                                                                                                                | <b>CAN02 - Vancouver -<br/>Children's and<br/>Women's Health<br/>Centre of British<br/>Columbia</b> | Thompson<br>Metzger<br>Marshall<br>Kwan | David<br>Daniel<br>Colleen<br>Jennifer | Local Investigator<br>Local Investigator<br>Coordinator (In<br>Transition)<br>Coordinator (In<br>Transition) |
|                                                                                                                | <b>CAN03 - Calgary -<br/>Alberta Children's<br/>Hospital</b>                                        | Stephure<br>Pacaud<br>Schwarz           | David K.<br>Daniele<br>Wendy           | Local Investigator<br>Co-Investigator<br>Coordinator                                                         |

## LIST OF TRIGR INVESTIGATORS FOR PUBLICATIONS / version December 2019

| <u>Administration/<br/>Country</u> | <u>Study center</u>                                                                                | <u>Last name</u>              | <u>First name</u>            | <u>Position</u>                                      |
|------------------------------------|----------------------------------------------------------------------------------------------------|-------------------------------|------------------------------|------------------------------------------------------|
|                                    | <b>CAN04 - Edmonton -<br/>Walter MacKenzie<br/>Health Sciences</b>                                 | Girgis<br>Thompson            | Rose<br>Marilyn              | Local Investigator<br>Coordinator                    |
|                                    | <b>CAN05 - Winnipeg -<br/>Health Sciences<br/>Centre</b>                                           | Taback<br>Catte               | Shayne P<br>Daniel           | Local Investigator<br>Coordinator                    |
|                                    | <b>CAN06 - Ottawa -<br/>Children's Hospital of<br/>Eastern Ontario and<br/>The Ottawa Hospital</b> | Lawson<br>Bradley             | Margaret L<br>Brenda         | Local Investigator<br>Coordinator                    |
|                                    | <b>CAN07 - Toronto<br/>Mount Sinai<br/>Hospital/Hospital for<br/>Sick Children</b>                 | Daneman<br>Sermer<br>Martin   | Denis<br>Mathew<br>Mary-Jean | Local Investigator<br>Co-Investigator<br>Coordinator |
|                                    | <b>CAN08 - Quebec -<br/>CHUQ</b>                                                                   | Morin<br>Frenette<br>Ferland  | Valérie<br>Line<br>Suzanne   | Local Investigator<br>Co-Investigator<br>Coordinator |
|                                    | <b>CAN09 - Saint John –<br/>Regional Hospital</b>                                                  | Sanderson<br>Heath            | Susan<br>Kathy               | Local Investigator<br>Coordinator                    |
|                                    | <b>CAN10 - Montreal - L'<br/>Hôpital Sainte-Justine</b>                                            | Huot<br>Gonthier<br>Thibeault | Céline<br>Monique<br>Maryse  | Local Investigator<br>Co-Investigator<br>Coordinator |
|                                    | <b>CAN11 - Montreal<br/>Children's Hospital</b>                                                    | Legault<br>Laforte            | Laurent<br>Diane             | Local Investigator<br>Coordinator                    |

## LIST OF TRIGR INVESTIGATORS FOR PUBLICATIONS / version December 2019

| <u>Administration/<br/>Country</u> | <u>Study center</u>                                                     | <u>Last name</u>                            | <u>First name</u>                  | <u>Position</u>                                                                                          |
|------------------------------------|-------------------------------------------------------------------------|---------------------------------------------|------------------------------------|----------------------------------------------------------------------------------------------------------|
|                                    | <b>CAN12 - Halifax - IWK Health Centre/Dalhousie</b>                    | Cummings<br>Scott                           | Elizabeth A<br>Karen               | Local Investigator<br>Coordinator                                                                        |
|                                    | <b>CAN13 - St. John's - Janeway Child Health Center</b>                 | Bridger<br>Crummell                         | Tracey<br>Cheryl                   | Local Investigator<br>Coordinator                                                                        |
|                                    | <b>CAN14 - Kingston - Kingston General Hospital/ Queen's University</b> | Houlden<br>Breen                            | Robyn<br>Adriana                   | Local Investigator<br>Coordinator                                                                        |
|                                    | <b>CAN15 - Regina - Regina Qu'Appelle</b>                               | Carson<br>Kelly                             | George<br>Sheila                   | Local Investigator<br>Coordinator                                                                        |
|                                    | <b>CAN16 - Saskatoon - Royal University Hospital</b>                    | Sankaran<br>Penner                          | Koravangattu<br>Marie              | Local Investigator<br>Coordinator                                                                        |
|                                    | <b>CAN17 - Peterborough - Peterborough Regional Health Centre</b>       | White<br>King                               | Richard A<br>Nancy                 | Local Investigator<br>Coordinator                                                                        |
|                                    | <b>CAN18 - Victoria - Vancouver Island Health Research Centre</b>       | Popkin<br>Robson                            | James<br>Laurie                    | Local Investigator<br>Coordinator                                                                        |
| <b>Czech Republic</b>              | <b>CZE01 - Prague - Faculty Hospital Kralovske Vinohrady</b>            | Al Taji<br>Mendlova<br>Romanova<br>Vavrinec | Eva<br>Pavla<br>Martina<br>Jan † * | National<br>Investigator/Coordinator<br>National Coordinator<br>Co-Investigator<br>National Investigator |

## LIST OF TRIGR INVESTIGATORS FOR PUBLICATIONS / version December 2019

| <u>Administration/<br/>Country</u> | <u>Study center</u>                                                 | <u>Last name</u>       | <u>First name</u> | <u>Position</u>                          |
|------------------------------------|---------------------------------------------------------------------|------------------------|-------------------|------------------------------------------|
|                                    |                                                                     | Vosahlo                | Jan               | Co-Investigator                          |
|                                    | <b>CZE02 - Brno -<br/>Hospital Milosrdnych<br/>Bratri</b>           | Brazdova               | Ludmila           | Local Investigator                       |
|                                    | <b>CZE03- Olomouc -<br/>Faculty Hospital<br/>Olomouc</b>            | Venhacova<br>Venhacova | Jitrenka<br>Petra | Local Investigator<br>Co-Investigator    |
|                                    | <b>CZE04 - Usti nad<br/>Labem - Hospital of<br/>Masryk</b>          | Cipra                  | Adam              | Local Investigator                       |
|                                    | <b>CZE05 - Ceske<br/>Budejovice - Hospital<br/>Ceske Budejovice</b> | Tomsikova              | Zdenka            | Local Investigator                       |
|                                    | <b>CZE06 - Plzen - Faculty<br/>Hospital Plzen</b>                   | Paterová               | Petra             | Local Investigator                       |
|                                    | <b>CZE07 - Zlin - Hospital<br/>of Bata</b>                          | Gogelova               | Pavla             | Local Investigator                       |
| <b>Estonia</b>                     | <b>EST01 - Tallinn -<br/>Tallinn Children's<br/>Hospital</b>        | Einberg<br>Riikjärv    | Ülle<br>Mall-Anne | Co-Investigator<br>Local Investigator    |
|                                    | <b>EST02 - Tartu - Tartu<br/>University Children's<br/>Hospital</b> | Ormisson<br>Tillmann   | Anne<br>Vallo     | National Investigator<br>Co-Investigator |

## LIST OF TRIGR INVESTIGATORS FOR PUBLICATIONS / version December 2019

| <u>Administration/<br/>Country</u>                                               | <u>Study center</u>                                                                            | <u>Last name</u>      | <u>First name</u>  | <u>Position</u>      |
|----------------------------------------------------------------------------------|------------------------------------------------------------------------------------------------|-----------------------|--------------------|----------------------|
| Finland                                                                          | FIN01 - Helsinki –<br>Children’s Hospital,<br>University of Helsinki                           | Johansson             | Susanne            | National Coordinator |
|                                                                                  |                                                                                                | Kleemola              | Päivi              | National Coordinator |
|                                                                                  |                                                                                                | Parkkola              | Anna               | Local Investigator   |
|                                                                                  | FIN02 - Helsinki -<br>Department of<br>Obstetrics and<br>Gynecology,<br>University of Helsinki | Järvenpää             | Anna-Liisa         | Local Investigator   |
|                                                                                  | FIN03 - Espoo - Jorvi<br>Hospital                                                              | Hämäläinen<br>Kiiveri | Anu-Maaria         | Local Investigator   |
|                                                                                  |                                                                                                |                       | Sanne              | Local Investigator   |
|                                                                                  | FIN04 - Kotka -<br>Kymenlaakso Central<br>Hospital                                             | Salonen<br>Tenhola    | Maria              | Local Investigator   |
|                                                                                  |                                                                                                |                       | Sirpa              | Local Investigator   |
| FIN05 - Lahti - Paijat-<br>Hame Central Hospital                                 | Salonen                                                                                        | Pia                   | Local Investigator |                      |
| FIN06 - Tampere -<br>Department of<br>Pediatrics, Tampere<br>University Hospital | Jason<br>Selvenius<br>Siljander                                                                | Eeva                  | Local Investigator |                      |
|                                                                                  |                                                                                                | Jenni                 | Local Investigator |                      |
|                                                                                  |                                                                                                | Heli                  | Co-Investigator    |                      |
| FIN07 - Pori -<br>Satakunta Central<br>Hospital                                  | Ylitalo                                                                                        | Samuli                | Local Investigator |                      |
| FIN08 - Jyväskylä -<br>Central Finland Central<br>Hospital                       | Paajanen                                                                                       | Ilkka                 | Local Investigator |                      |

## LIST OF TRIGR INVESTIGATORS FOR PUBLICATIONS / version December 2019

| <u>Administration/<br/>Country</u> | <u>Study center</u>                                                                      | <u>Last name</u>      | <u>First name</u> | <u>Position</u>                       |
|------------------------------------|------------------------------------------------------------------------------------------|-----------------------|-------------------|---------------------------------------|
|                                    | <b>FIN09 - Seinäjoki -<br/>South Ostrobothnia<br/>Central Hospital</b>                   | Talvitie              | Timo              | Local Investigator                    |
|                                    | <b>FIN10 - Hyvinkää -<br/>Hyvinkää Hospital</b>                                          | Lindström             | Kaija             | Local Investigator                    |
|                                    | <b>FIN11 - Kuopio -<br/>Department of<br/>Pediatrics, Kuopio<br/>University Hospital</b> | Huopio<br>Pesola      | Hanna<br>Jouni    | Local investigator<br>Co-Investigator |
|                                    | <b>FIN12 - Oulu -<br/>Department of<br/>Pediatrics, Oulu<br/>University Hospital</b>     | Veijola<br>Tapanainen | Riitta<br>Päivi   | Local Investigator<br>Co-Investigator |
|                                    | <b>FIN13 - Hämeenlinna -<br/>Kanta-Häme Central<br/>Hospital</b>                         | Alar                  | Abram             | Local Investigator                    |
|                                    | <b>FIN14 - Vaasa - Vaasa<br/>Central Hospital</b>                                        | Popov                 | Erik              | Local Investigator                    |
|                                    | <b>FIN15 - Lappeenranta -<br/>South Carelian Central<br/>Hospital</b>                    | Virransalo            | Ritva             | Local Investigator                    |
|                                    | <b>FIN16 - Mikkeli -<br/>Mikkeli Central<br/>Hospital</b>                                | Nykänen               | Päivi             | Local Investigator                    |



## LIST OF TRIGR INVESTIGATORS FOR PUBLICATIONS / version December 2019

| <u>Administration/<br/>Country</u> | <u>Study center</u>                                                      | <u>Last name</u> | <u>First name</u> | <u>Position</u>       |
|------------------------------------|--------------------------------------------------------------------------|------------------|-------------------|-----------------------|
| Germany                            | GER01 - Hannover -<br>Kinder- und<br>Jugendkrankenhaus –<br>Auf der Bult | Aschemeier       | Bärbel            | National Coordinator  |
|                                    |                                                                          | Danne            | Thomas            | National Investigator |
|                                    |                                                                          | Kordonouri       | Olga              | Co-Investigator       |
| Hungary                            | HUN01 - Budapest -<br>Semmelweis Medical<br>University                   | Krikovszky       | Dóra              | Co-Investigator       |
|                                    |                                                                          | Madácsy          | László            | National Investigator |
| Italy                              | ITA01 - Rome -<br>University Campus<br>Bio-Medico of Rome                | Khazrai          | Yeganeh Manon     | Local Coordinator     |
|                                    |                                                                          | Maddaloni        | Ernesto           | Local Coordinator     |
|                                    |                                                                          | Pozzilli         | Paolo             | National Investigator |
|                                    | SAR01 - Cagliari - St.<br>Michele Hospital                               | Mannu            | Carla             | Local Coordinator     |
|                                    |                                                                          | Songini          | Marco             | National Investigator |
| Luxembourg                         | LUX01 - Luxembourg -<br>Centre Hospitalier de<br>Luxembourg              | de Beaufort      | Carine            | National Investigator |
|                                    |                                                                          | Schierloh        | Ulrike            | Co-Investigator       |
| The Netherlands                    | NET01 - Rotterdam -<br>Sophia Children's<br>Hospital                     | Bruining         | Jan † *           | National Investigator |
|                                    |                                                                          | Bisschoff        | Margriet          | National Coordinator  |
| Poland                             | POL01 - Wroclaw -<br>Medical University of<br>Wroclaw                    | Basiak           | Aleksander        | Co-Investigator       |
|                                    |                                                                          | Wasikowa         | Renata            | National Investigator |
|                                    | POL02 - Krakow -<br>Polish-American<br>Children's Hospital               | Ciechanowska     | Marta             | Local Investigator    |
|                                    |                                                                          | Deja             | Grazyna           | Co-Investigator       |

## LIST OF TRIGR INVESTIGATORS FOR PUBLICATIONS / version December 2019

| <u>Administration/<br/>Country</u> | <u>Study center</u>                                                                                    | <u>Last name</u>                           | <u>First name</u>                          | <u>Position</u>                                               |
|------------------------------------|--------------------------------------------------------------------------------------------------------|--------------------------------------------|--------------------------------------------|---------------------------------------------------------------|
|                                    | <b>POL03 - Katowice -<br/>Medical University of<br/>Silesia</b>                                        | Jarosz-Chobot                              | Przemyslaw                                 | Local Investigator                                            |
|                                    | <b>POL04 - Lodz - Medical<br/>University of Lodz</b>                                                   | Szadkowska                                 | Agnieszka                                  | Co-Investigator                                               |
|                                    | <b>POL05 - Lodz - Polish<br/>Mother's Memorial<br/>Hospital (I.C.Z.M.P)</b>                            | Cypryk<br>Zawodniak-Szalapska              | Katarzyna<br>Malgorzata                    | Local Investigator<br>Co-Investigator                         |
| <b>Spain</b>                       | <b>SPA01 - Cruces<br/>University Hospital-<br/>UPV/EHU-<br/>CIBERDEM/CIBERER,<br/>Barakaldo, Spain</b> | Castano<br>Chueca<br>Gonzalez Frutos       | Luis<br>Maria<br>Teba                      | National Investigator<br>Co-Investigator<br>Local Coordinator |
|                                    | <b>SPA02 - Madrid -<br/>Hospital Clinico San<br/>Carlos</b>                                            | Serrano-Ríos<br>Martínez-Larrad<br>Hawkins | Manuel<br>María Teresa<br>Federico Gustavo | National Investigator<br>Local Coordinator<br>Co-Investigator |
|                                    | <b>SPA03 - Madrid -<br/>Hospital Gregorio<br/>Marañon</b>                                              | Rodriguez Arnau                            | Dolores                                    | Co-Investigator                                               |
| <b>Sweden</b>                      | <b>SWE01 - Linköping -<br/>University of<br/>Linköping</b>                                             | Ludvigsson<br>Smolinska Konefal            | Johnny<br>Malgorzata                       | National Investigator<br>National Coordinator                 |
|                                    | <b>SWE02 - Uddevalla -<br/>Uddevalla Hospital</b>                                                      | Hanas                                      | Ragnar                                     | Local Investigator                                            |
|                                    | <b>SWE03 - Göteborg -<br/>GothenburgThe Queen</b>                                                      | Lindblad                                   | Bengt                                      | Local Investigator                                            |

## LIST OF TRIGR INVESTIGATORS FOR PUBLICATIONS / version December 2019

| <u>Administration/<br/>Country</u> | <u>Study center</u>                                                   | <u>Last name</u>               | <u>First name</u>                | <u>Position</u>                                                                                                 |
|------------------------------------|-----------------------------------------------------------------------|--------------------------------|----------------------------------|-----------------------------------------------------------------------------------------------------------------|
|                                    | <b>Silvia Children's<br/>Hospital</b>                                 |                                |                                  |                                                                                                                 |
|                                    | <b>SWE05 - Halmstad -<br/>Halmstad Hospital</b>                       | Nilsson                        | Nils-Östen                       | Local Investigator                                                                                              |
|                                    | <b>SWE06 - Trollhättan -<br/>Trollhättan Hospital</b>                 | Fors                           | Hans                             | Local Investigator                                                                                              |
|                                    | <b>SWE07 - Norrköping -<br/>Vrinnevi Hospital</b>                     | Nordwall                       | Maria                            | Local Investigator                                                                                              |
|                                    | <b>SWE08 - Borås - Borås<br/>Hospital</b>                             | Lindh                          | Agne                             | Local Investigator                                                                                              |
|                                    | <b>SWE09 - Karskrona -<br/>Karlskrona Hospital</b>                    | Edenwall                       | Hans                             | Local Investigator                                                                                              |
|                                    | <b>SWE10 - Örebro -<br/>University Hospital</b>                       | Åman                           | Jan                              | Local Investigator                                                                                              |
|                                    | <b>SWE11 - Jönköping -<br/>Ryhovs Hospital</b>                        | Johansson                      | Calle                            | Local Investigator                                                                                              |
| <b>Switzerland</b>                 | <b>SWT01 - Zürich -<br/>University Children's<br/>Hospital</b>        | Gadient<br>Konrad<br>Schoenle  | Margrit<br>Daniel<br>Eugen       | Local Coordinator<br>National Investigator<br>National Investigator                                             |
| <b>USA</b>                         | <b>USA01 - Pittsburgh -<br/>Children's Hospital of<br/>Pittsburgh</b> | Becker<br><br>Daftary<br>Klein | Dorothy<br><br>Ashi<br>Mary Beth | USA National<br>Investigator / Pittsburgh<br>Local Investigator<br>Co-Investigator<br>Pittsburgh<br>Coordinator |

## LIST OF TRIGR INVESTIGATORS FOR PUBLICATIONS / version December 2019

| <u>Administration/<br/>Country</u> | <u>Study center</u>                                                                                     | <u>Last name</u> | <u>First name</u> | <u>Position</u>                  |
|------------------------------------|---------------------------------------------------------------------------------------------------------|------------------|-------------------|----------------------------------|
|                                    |                                                                                                         | Gilmour          | Carol             | Co-Investigator                  |
|                                    | <b>USA02 - Seattle - VA<br/>Puget Sound Health<br/>Care System and<br/>University of<br/>Washington</b> | Palmer           | Jerry             | Local Investigator               |
|                                    |                                                                                                         | Palmer           | Patty             | Local Investigator               |
|                                    |                                                                                                         | Malone           | Patty             | Coordinator                      |
|                                    | <b>USA03 - St. Louis -<br/>Washington University</b>                                                    | Tanner-Blasiar   | Marilyn           | Coordinator                      |
|                                    |                                                                                                         | White            | Neil              | Local Investigator               |
|                                    | <b>USA04 - Los Angeles -<br/>Mattel Children's<br/>Hospital of UCLA</b>                                 | Devaskar         | Uday              | Local Investigator               |
|                                    |                                                                                                         | Horowitz         | Heather           | Coordinator/dietitian            |
|                                    |                                                                                                         | Rogers           | Lisa              | Coordinator/dietitian            |
|                                    | <b>USA05 - Ponce - Ponce<br/>School of Medicine</b>                                                     | Colon            | Roxana            | Coordinator                      |
|                                    |                                                                                                         | Frazer           | Teresa            | Co-Investigator                  |
|                                    |                                                                                                         | Torres           | Jose              | Local Investigator               |
|                                    | <b>USA06 - New York -<br/>Naomie Berrie<br/>Diabetes Center</b>                                         | Goland           | Robin             | Local Investigator               |
|                                    |                                                                                                         | Greenberg        | Ellen             | Coordinator                      |
|                                    |                                                                                                         | Schachner        | Holly             | Co-Investigator                  |
|                                    |                                                                                                         | Softness         | Barney            | Co-Investigator                  |
| <b>Laboratories</b>                | <b>HLA-typing Laboratory<br/>– University of Turku –<br/>Finland</b>                                    | Ilonen           | Jorma             | Head of HLA-typing<br>Laboratory |
|                                    |                                                                                                         | Trucco           | Massimo           | Head of HLA-typing<br>Laboratory |
|                                    |                                                                                                         | Nichol           | Lynn              | Chief Technician                 |

## LIST OF TRIGR INVESTIGATORS FOR PUBLICATIONS / version December 2019

| <u>Administration/<br/>Country</u> | <u>Study center</u>                                                          | <u>Last name</u> | <u>First name</u> | <u>Position</u>                        |
|------------------------------------|------------------------------------------------------------------------------|------------------|-------------------|----------------------------------------|
|                                    | <b>Cow's Milk Antibody Laboratory – University of Helsinki – Finland</b>     | Savilahti        | Erkki             | Head of Cow's Milk Antibody Laboratory |
|                                    | <b>Autoantibody Laboratory – University of Helsinki – Finland</b>            | Härkönen         | Taina             | Co-Investigator                        |
|                                    |                                                                              | Knip             | Mikael            | Head of Antibody Laboratory            |
|                                    | <b>T-Cell Laboratory - Helsinki – Finland</b>                                | Vaarala          | Outi              | Head of T-cell Laboratory              |
|                                    |                                                                              | Luopajarvi       | Kristiina         | Co-Investigator                        |
|                                    | <b>T-Cell Laboratory – Hospital for Sick Children, Toronto - ON - Canada</b> | Dosch            | Hans-Michael      | Head of T-Cell Laboratory              |
